# Supplementary material for: Coffee Consumption and Lung Cancer Risk: The Japan Public Health Center-Based Prospective Study
Source: PubMed Central journal article supplement (PMC5865012; doi:10.2188/jea.je20160191), 2018-04-05
Supplement: je-28-207-s001.pdf [file je-28-207-s001.pdf]

**eTable 1.** Hazard ratios (95% confidence intervals) for lung cancer incidence by daily coffee consumption: sub-analysis by gender

| Lung cancer                    | Coffee intake |                  |                  |                   |                    | P-trend |
|--------------------------------|---------------|------------------|------------------|-------------------|--------------------|---------|
|                                | No Coffee     | <1 Cup/day       | 1–2 Cups/day     | 3–4 Cups/day      | ≥5 Cups/day        |         |
| <b>Adenocarcinoma</b>          |               |                  |                  |                   |                    |         |
| <i>Men</i>                     |               |                  |                  |                   |                    |         |
| Number of cases                | 146           | 115              | 109              | 32                | 17                 | —       |
| Age, area                      | 1.00          | 0.89 (0.69–1.13) | 1.21 (0.94–1.56) | 1.12 (0.76–1.66)  | 1.63 (0.98–2.70)   | 0.048   |
| Age, area, smoking             | 1.00          | 0.77 (0.60–0.99) | 1.01 (0.78–1.31) | 0.78 (0.52–1.17)  | 1.06 (0.62–1.80)   | 0.770   |
| Multivariate-adjusted          | 1.00          | 0.84 (0.64–1.11) | 1.09 (0.82–1.44) | 0.76 (0.48–1.20)  | 1.00 (0.55–1.81)   | 0.831   |
| <i>Women</i>                   |               |                  |                  |                   |                    |         |
| Number of cases                | 120           | 101              | 67               | 14                | 8                  | —       |
| Age, area                      | 1.00          | 1.06 (0.81–1.38) | 0.90 (0.65–1.22) | 0.89 (0.50–1.58)  | 1.72 (0.83–3.56)   | 0.975   |
| Age, area, smoking             | 1.00          | 1.06 (0.81–1.39) | 0.86 (0.62–1.18) | 0.87 (0.50–1.55)  | 1.67 (0.80–3.48)   | 0.818   |
| Multivariate-adjusted          | 1.00          | 1.07 (0.79–1.43) | 0.84 (0.59–1.20) | 0.85 (0.46–1.60)  | 1.48 (0.63–3.45)   | 0.659   |
| <b>Squamous cell carcinoma</b> |               |                  |                  |                   |                    |         |
| <i>Men</i>                     |               |                  |                  |                   |                    |         |
| Number of cases                | 99            | 95               | 68               | 29                | 15                 | —       |
| Age, area                      | 1.00          | 1.14 (0.86–1.52) | 1.26 (0.92–1.73) | 1.83 (1.20–2.80)  | 2.49 (1.44–4.32)   | <0.001  |
| Age, area, smoking             | 1.00          | 1.00 (0.75–1.35) | 1.01 (0.73–1.41) | 1.15 (0.74–1.79)  | 1.41 (0.81–2.48)   | 0.322   |
| Multivariate-adjusted          | 1.00          | 1.11 (0.80–1.53) | 1.08 (0.75–1.55) | 1.10 (0.67–1.81)  | 1.19 (0.62–2.30)   | 0.563   |
| <i>Women</i>                   |               |                  |                  |                   |                    |         |
| Number of cases                | 8             | 11               | 8                | 1                 | 1                  | —       |
| Age, area                      | 1.00          | 1.80 (0.72–4.52) | 1.67 (0.59–4.68) | 1.03 (0.12–8.69)  | 3.42 (0.41–28.46)  | 0.316   |
| Age, area, smoking             | 1.00          | 1.62 (0.63–4.12) | 1.47 (0.53–4.11) | NA                | 1.28 (0.15–11.05)  | 0.914   |
| Multivariate-adjusted          | 1.00          | 1.42 (0.49–4.09) | 1.29 (0.40–4.13) | NA                | 1.16 (0.13–10.69)  | 0.763   |
| <b>Small cell carcinoma</b>    |               |                  |                  |                   |                    |         |
| <i>Men</i>                     |               |                  |                  |                   |                    |         |
| Number of cases                | 24            | 58               | 32               | 17                | 6                  | —       |
| Age, area                      | 1.00          | 2.84 (1.76–4.57) | 2.32 (1.36–3.98) | 4.05 (2.14–7.66)  | 4.10 (1.65–10.14)  | <0.001  |
| Age, area, smoking             | 1.00          | 2.72 (1.66–4.45) | 1.94 (1.11–3.39) | 2.60 (1.34–5.06)  | 2.00 (0.74–5.38)   | 0.026   |
| Multivariate-adjusted          | 1.00          | 2.91 (1.62–5.22) | 2.49 (1.32–4.69) | 3.25 (1.55–6.81)  | 2.82 (1.00–7.94)   | 0.005   |
| <i>Women</i>                   |               |                  |                  |                   |                    |         |
| Number of cases                | 4             | 3                | 5                | 4                 | 3                  | —       |
| Age, area                      | 1.00          | 0.92 (0.20–4.13) | 1.68 (0.43–6.61) | 6.86 (1.55–30.33) | 15.24 (3.17–73.24) | <0.001  |
| Age, area, smoking             | 1.00          | 0.91 (0.20–4.09) | 1.33 (0.34–5.17) | 3.40 (0.77–15.07) | 4.34 (0.86–21.96)  | 0.040   |
| Multivariate-adjusted          | 1.00          | 0.55 (0.08–3.10) | 1.16 (0.29–4.68) | 4.30 (0.94–19.80) | 4.07 (0.74–22.49)  | 0.033   |
| <b>Other</b>                   |               |                  |                  |                   |                    |         |
| <i>Men</i>                     |               |                  |                  |                   |                    |         |
| Number of cases                | 134           | 102              | 87               | 31                | 11                 | —       |
| Age, area                      | 1.00          | 0.90 (0.66–1.17) | 1.14 (0.87–1.51) | 1.37 (0.92–2.05)  | 1.32 (0.71–2.46)   | 0.085   |
| Age, area, smoking             | 1.00          | 0.82 (0.63–1.07) | 0.95 (0.72–1.27) | 0.93 (0.62–1.41)  | 0.85 (0.46–1.60)   | 0.665   |
| Multivariate-adjusted          | 1.00          | 0.92 (0.68–1.24) | 0.94 (0.68–1.31) | 0.97 (0.62–1.53)  | 1.06 (0.56–2.02)   | 0.947   |
| <i>Women</i>                   |               |                  |                  |                   |                    |         |
| Number of cases                | 31            | 24               | 23               | 4                 | 1                  | —       |
| Age, area                      | 1.00          | 1.00 (0.58–1.71) | 1.18 (0.67–2.08) | 1.00 (0.34–2.94)  | 0.87 (0.12–6.46)   | 0.766   |
| Age, area, smoking             | 1.00          | 1.05 (0.61–1.81) | 1.12 (0.63–2.00) | 0.79 (0.27–2.37)  | 0.51 (0.07–3.92)   | 0.798   |
| Multivariate-adjusted          | 1.00          | 0.97 (0.53–1.77) | 1.14 (0.61–2.14) | 0.83 (0.27–2.55)  | 0.67 (0.09–5.12)   | 0.937   |

Multivariate analyses were adjusted for the following factors at baseline: age (continuous); gender; PHC area; body-mass index (<18.5, 18.5–24.9, 25.0–29.9, and ≥30 kg/m<sup>2</sup>); smoking status (never, former: <10, 10–19, and ≥20 years of smoking cessation, current: 1–19, 20–29, 30–39, 40–49, 50–59, ≥60 pack-years); physical activity (almost never, <3 days/month, 1–2 days/week, 3–4 days/week, and almost everyday); alcohol consumption (never/former, <1 time/week, <23, 23–45, 46–68, 69–91, and >92 g of ethanol/day); consumption of green tea, Chinese tea, and black tea (almost never, <1 time/week, and >1 cup/day); energy-adjusted intake of fruit, vegetables, and isoflavone (continuous).

**eTable 2.** Hazard ratios (95% confidence intervals) for lung cancer incidence by daily tea (green, oolong, and black tea) consumption

| Lung cancer                 | Tea intake |                  |                  | P-trend |
|-----------------------------|------------|------------------|------------------|---------|
|                             | No tea     | <3 Cup/day       | ≥3 Cups/day      |         |
| <b>Green tea</b>            |            |                  |                  |         |
| Number of cases             | 173        | 160              | 1,318            | —       |
| Age, area                   | 1.00       | 0.90 (0.72–1.11) | 1.00 (0.85–1.18) | 0.687   |
| Multivariate-adjusted       | 1.00       | 1.01 (0.79–1.30) | 1.09 (0.90–1.32) | 0.928   |
| <b>Chinese (oolong) tea</b> |            |                  |                  |         |
| Number of cases             | 1,120      | 288              | 154              | —       |
| Age, area                   | 1.00       | 0.86 (0.76–0.98) | 0.98 (0.82–1.16) | 0.235   |
| Multivariate-adjusted       | 1.00       | 0.87 (0.76–0.99) | 0.99 (0.83–1.18) | 0.310   |
| <b>Black tea</b>            |            |                  |                  |         |
| Number of cases             | 1,392      | 212              | 35               | —       |
| Age, area                   | 1.00       | 0.90 (0.78–1.04) | 0.98 (0.70–1.37) | 0.253   |
| Multivariate-adjusted       | 1.00       | 0.92 (0.80–1.07) | 1.02 (0.72–1.44) | 0.476   |

Multivariate analyses were adjusted for the following factors at baseline: age (continuous); gender; PHC area; body-mass index (<18.5, 18.5–24.9, 25.0–29.9, and ≥30 kg/m<sup>2</sup>); smoking status (never, former: <10, 10–19, and ≥20 years of smoking cessation, current: 1–19, 20–29, 30–39, 40–49, 50–59, ≥60 pack-years); physical activity (almost never, <3 days/month, 1–2 days/week, 3–4 days/week, and almost everyday); alcohol consumption (never/former, <1 time/week, <23, 23–45, 46–68, 69–91, and >92 g of ethanol/day); coffee intake (almost never, <1 cup/day, 1–2 cups/day, 3–4 cups/day, ≥5 cups/day); energy-adjusted intake of fruit, vegetables, and isoflavone (continuous).
